# Supplementary material for: Therapeutic Role of Polyphenol Extract from Prunus cerasifera Ehrhart on Non-Alcoholic Fatty Liver
Source: MDPI journal article supplement (doi:10.3390/plants13020288), 2024-01-18
Supplement: s1 [file s1]

## Supplementary Materials and Methods:

### S1. NAS semi-quantitative scoring system

Hepatocellular steatosis: 0 points (< 5%); 1 points (5% to 33%); 2 points (34% to 66%); 3 points (> 66%). Intralobular inflammation (necrosis foci counted under 20x microscope): 0 points, none; 1 point (< 2 foci); 2 points (2 to 4 foci); 3 points (> 4 foci). Hepatocellular ballooning: 0 points, none; 1 point, rare; 2 points, common.

The NAS score is obtained by adding the above three scores of hepatocyte steatosis, hepatocyte ballooning, and intralobular inflammation.

### S2. Detailed methods for detection of targeted BAs metabolic profiling in feces.

#### *S2.1. Metabolites Extraction*

A 25 mg aliquot of each individual sample was precisely weighed and transferred to an Eppendorf tube. After the addition of 1000  $\mu$ L of extract solution (precooled at -40 °C, acetonitrile-methanol-water, 2:2:1), the samples were vortexed for 30 s, homogenized at 35 Hz for 4 min, and sonicated for 5 min in ice-water bath. The homogenate and sonicate cycle were repeated for three times, followed by incubation at -40 °C for 1 h and centrifugation at 12000 rpm (RCF=13800( $\times$ g), R=8.6cm) and 4 °C for 15 min. The resulting supernatants were transferred to LC-MS vials for UHPLC-MS/MS analysis.

#### *S2.2. Standard Solution Preparation*

Stock solutions were individually prepared by dissolving or diluting each standard substance to give a final concentration of 1 mg/mL. An aliquot of each of the stock solutions was transferred to a flask to form a mixed working standard solution. A series of calibration standard solutions were then prepared by stepwise dilution of this mixed standard solution (containing isotopically-labelled internal standard mixture in identical concentrations with the samples).

#### *S2.3. UHPLC-PRM-MS Analysis*

The UHPLC separation was carried out using an UHPLC System (Vanquish, Thermo Fisher Scientific), equipped with a Waters ACQUITY UPLC BEH C18 column (150 \* 2.1 mm, 1.7  $\mu$ m, Waters). The mobile phase A was 5 mmol/L ammonium acetate in water, and the mobile phase B was acetonitrile. The column temperature was set at 45 °C. The auto-sampler temperature was set at 4 °C and the injection volume was 1  $\mu$ L.

A Orbitrap Exploris 120 mass spectrometer (Thermo Fisher Scientific) was applied for assay development. Typical ion source parameters were: spray voltage = +3500/-3200 V, sheath gas (N<sub>2</sub>) flow rate = 40, aux gas (N<sub>2</sub>) flow rate = 15, sweep gas (N<sub>2</sub>) flow rate = 0, aux gas (N<sub>2</sub>) temperature = 350 °C, capillary temperature = 320 °C.

The parallel reaction monitoring (PRM) parameters for each of the targeted analytes were optimized, by injecting the standard solutions of the individual analytes, into the API source of the mass spectrometer. Since most of the analytes did not show product ion acceptable for quantification, the precursor ion in high resolution was selected for quantification.

#### *S2.4. Calibration Curves*

Calibration solutions were subjected to UPLC-PRM-MS/MS analysis using the methods described above. Figure S1-Calibration summarizes the results for the calibration curves where y is the peak areas ratio for analyte/IS, and x is the concentration (nmol/L) for analyte. Least squares method was



used for the regression fitting.  $1/x$  weighting was applied in the curve fitting since it provided highest accuracy and correlation coefficient ( $R^2$ ). The level was excluded from the calibration if the accuracy of calibration was not within 80–120%.

#### *S2.5. Limit of Detection (LOD) and Limit of Quantitation (LOQ)*

The calibration standard solution was diluted stepwise, with a dilution factor of 2. These standard solutions were subjected to UHPLC-PRM-MS analysis. The signal-to-noise ratios (S/N) were used to determine the lower limits of detection (LLODs) and lower limits of quantitation (LLOQs). The LLODs and LLOQs were defined as the analyte concentrations that led to peaks with signal-to-noise ratios (S/N) of 3 and 10, respectively, according to the US FDA guideline for bioanalytical method validation.

#### *S2.6. Precision and Accuracy*

The precision of the quantitation was measured as the relative standard deviation (RSD), determined by injecting analytical replicates of a QC sample. The accuracy of quantitation was measured as the analytical recovery of the QC sample determined. The percent recovery was calculated as  $[(\text{mean observed concentration}) / (\text{spiked concentration})] \times 100\%$ .



### S3. Detailed methods for detection of non-targeted metabolic profile in serum.

#### *S3.1. Metabolites Extraction*

100  $\mu$ L of sample was transferred to an EP tube. After the addition of 400  $\mu$ L of extract solution (methanol: acetonitrile= 1: 1, containing isotopically-labelled internal standard mixture), the samples were vortexed for 30 s, sonicated for 10 min in ice-water bath, and incubated for 1 h at -40 °C to precipitate proteins. Then the sample was centrifuged at 12000 rpm(RCF=13800( $\times$ g),R=8.6cm) for 15 min at 4 °C. The resulting supernatant was transferred to a fresh glass vial for analysis. The quality control (QC) sample was prepared by mixing an equal aliquot of the supernatants from all of the samples.

#### *S3.2. LC-MS/MS Analysis*

LC-MS/MS analyses were performed using an UHPLC system (Vanquish, Thermo Fisher Scientific) with a UPLC BEH Amide column (2.1 mm  $\times$  100 mm, 1.7  $\mu$ m) coupled to Q Exactive HFX mass spectrometer (Orbitrap MS, Thermo). The mobile phase consisted of 25 mmol/L ammonium acetate and 25 ammonia hydroxide in water (pH = 9.75) (A) and acetonitrile (B). The auto-sampler temperature was 4 °C, and the injection volume was 2  $\mu$ L.

The QE HFX mass spectrometer was used for its ability to acquire MS/MS spectra on information-dependent acquisition (IDA) mode in the control of the acquisition software (Xcalibur, Thermo). In this mode, the acquisition software continuously evaluates the full scan MS spectrum. The ESI source conditions were set as following: sheath gas flow rate as 30 Arb, Aux gas flow rate as 25 Arb, capillary temperature 350 °C, full MS resolution as 120000, MS/MS resolution as 7500, collision energy as 10/30/60 in NCE mode, spray Voltage as 3.6 kV (positive) or -3.2 kV (negative), respectively.

#### *S3.3. Data preprocessing and annotation*

The raw data were converted to the mzXML format using ProteoWizard and processed with an in-house program, which was developed using R and based on XCMS, for peak detection, extraction, alignment, and integration. Then an in-house MS2 database (BiotreeDB) was applied in metabolite annotation. The cutoff for annotation was set at 0.3.



**Supplementary Table S1:** Analysis of main components of fruit polyphenol by mass spectrometry

| No. | tR(min) | [M-H] <sup>-</sup> | ppmError | Molecular formula                               | MS/MS                                                 | Compound                  |
|-----|---------|--------------------|----------|-------------------------------------------------|-------------------------------------------------------|---------------------------|
| 1   | 8.52    | 353.0880           | 3.7890   | C <sub>16</sub> H <sub>18</sub> O <sub>9</sub>  | 191(100), 179(50), 135(80)                            | 3-O-caffeoylquinic acid   |
| 2   | 8.91    | 353.0881           | 3.8665   | C <sub>16</sub> H <sub>18</sub> O <sub>9</sub>  | 191(100), 179(60), 135(70)                            | 5-O-caffeoylquinic acid   |
| 3   | 9.28    | 353.0879           | 3.6072   | C <sub>16</sub> H <sub>18</sub> O <sub>9</sub>  | 191(80), 179(30), 135(100)                            | 4-O-caffeoylquinic acid   |
| 4   | 10.87   | 431.1554           | 1.6213   | C <sub>19</sub> H <sub>28</sub> O <sub>11</sub> | 269(40), 161(30)                                      | Apigenin-O-glucoside      |
| 5   | 10.94   | 447.0941           | 4.3815   | C <sub>21</sub> H <sub>20</sub> O <sub>11</sub> | 284(100), 255(30)                                     | Kaempferol-3-O-glucoside  |
| 6   | 12.11   | 447.0927           | 1.2416   | C <sub>21</sub> H <sub>20</sub> O <sub>11</sub> | 284(100), 255(30)                                     | Kaempferol-7-O-glucoside  |
| 7   | 12.16   | 289.0717           | 3.7740   | C <sub>15</sub> H <sub>14</sub> O <sub>6</sub>  | 245(60), 203(90), 109(100)                            | Epicatechin               |
| 8   | 12.20   | 593.1513           | 2.1423   | C <sub>27</sub> H <sub>30</sub> O <sub>15</sub> | 284(100), 255(30)                                     | Kaempferol-O-rutinoside   |
| 9   | 14.84   | 289.0717           | 3.7740   | C <sub>15</sub> H <sub>14</sub> O <sub>6</sub>  | 245(20), 203(30), 109(100)                            | Catechin                  |
| 10  | 22.45   | 609.1464           | 2.3268   | C <sub>27</sub> H <sub>30</sub> O <sub>16</sub> | 300(50), 271(40), 255(30), 179(5), 151(10)            | Rutin                     |
| 11  | 22.94   | 463.0886           | 3.2837   | C <sub>21</sub> H <sub>20</sub> O <sub>12</sub> | 301(100), 271(60), 255(30), 243(30), 179(10), 151(20) | Hyperoside                |
| 12  | 23.32   | 463.0888           | 3.6791   | C <sub>21</sub> H <sub>20</sub> O <sub>12</sub> | 300(100), 271(100), 255(50), 227(20), 179(5), 151(20) | Isoquercetin              |
| 13  | 23.90   | 463.0890           | 4.20663  | C <sub>21</sub> H <sub>20</sub> O <sub>12</sub> | 300(100), 271(70), 255(30), 243(20), 179(5), 151(20)  | Quercetin-7-O-glucoside   |
| 14  | 24.89   | 433.0778           | 3.1014   | C <sub>20</sub> H <sub>18</sub> O <sub>11</sub> | 300(100), 271(50), 255(30), 151(20)                   | Quercetin-3-O-arabinoside |
| 15  | 26.28   | 433.0781           | 3.73560  | C <sub>20</sub> H <sub>18</sub> O <sub>11</sub> | 301(100), 271(70), 255(30), 243(20), 179(5), 151(20)  | Quercetin-7-O-arabinoside |
| 16  | 26.81   | 447.0930           | 1.8560   | C <sub>21</sub> H <sub>20</sub> O <sub>11</sub> | 300(80), 271(70), 255(100)                            | Quercetin-O-rhamnoside    |
| 17  | 28.44   | 593.1513           | 2.1423   | C <sub>27</sub> H <sub>30</sub> O <sub>15</sub> | 447(5), 285(100), 229(30)                             | Kaempferol-7-O-rutin      |
| 18  | 33.15   | 301.0352           | 3.3193   | C <sub>15</sub> H <sub>10</sub> O <sub>7</sub>  | 179(40), 151(80)                                      | Quercetin                 |

**Supplementary Table S2:** The primer sequences related to cholesterol metabolism and bile acids

metabolism

| Gene           | Forward sequence (5'→3')           | Reverse sequence (5'→3')           |
|----------------|------------------------------------|------------------------------------|
| HMGCR          | TGT TCA CCG GCA ACA ACA AGA        | CCG CGT TAT CGT CAG GAT GA         |
| LXR $\alpha$   | GCG TCC ATT CAG AGC AAG TGT        | TCA CTC GTG GAC ATC CCA GAT        |
| ABCA1          | GCT TGT TGG CCT CAG TTA AGG        | GTA GCT CAG GCG TAC AGA GAT        |
| ABCG5          | CGC GAG ACG TTG CGA TAC A          | CTG CCA ATC ATT TGG TCC GC         |
| ABCG8          | CTG TGG AAT GGG ACT GTA CTT C      | GTT GGA CTG ACC ACT GTA GGT        |
| NPC1L1         | TGT CCC CGC CTA TAC AAT GG         | CCT TGG TGA TAG ACA GGC TAC TG     |
| ACAT2          | GAC TTG GTG CAA TGG ACT CG         | GGT CTT GCT TGT AGA ATC TGG        |
| CYP7A1         | TTC AAG ACC GCA CAT AAA GCC        | GAG ATG CCC AGA GGA TCA CG         |
| CYP27A1        | AGG AAG TGA CCC AGT TTG TGT T      | GGT GTT GGA CCC TGG AGT TT         |
| FXR            | GCT TGA TGT GCT ACA AAA GCT G      | CGT GGT GAT GGT TGA ATG TCC        |
| SHP            | CAG GTC GTC CGA CTA TTC TGT        | AGG CTA CTG TCT TGG CTA GGA        |
| BSEP           | CTG CCA AGG ATG CTA ATG CA         | CGA TGG CTA CCC TTT GCT TCT        |
| NTCP           | CTT GCG CCA TAG GGA TCT TC         | TGC CTG CCT TGA GGA CGT A          |
| ASBT           | GTC TGT CCC CCA AAT GCA ACT        | CAC CCC ATA GAA AAC ATC ACC A      |
| FGF15          | GAC CAA AAC GAA CGA AAT TTG TT     | ACG TCC TTG ATG GCA ATC G          |
| $\beta$ -actin | CCT AGA AGC ATT TGC GGT GCA CGA TG | TCA TGA AGT GTG ACG TTG ACA TCC GT |



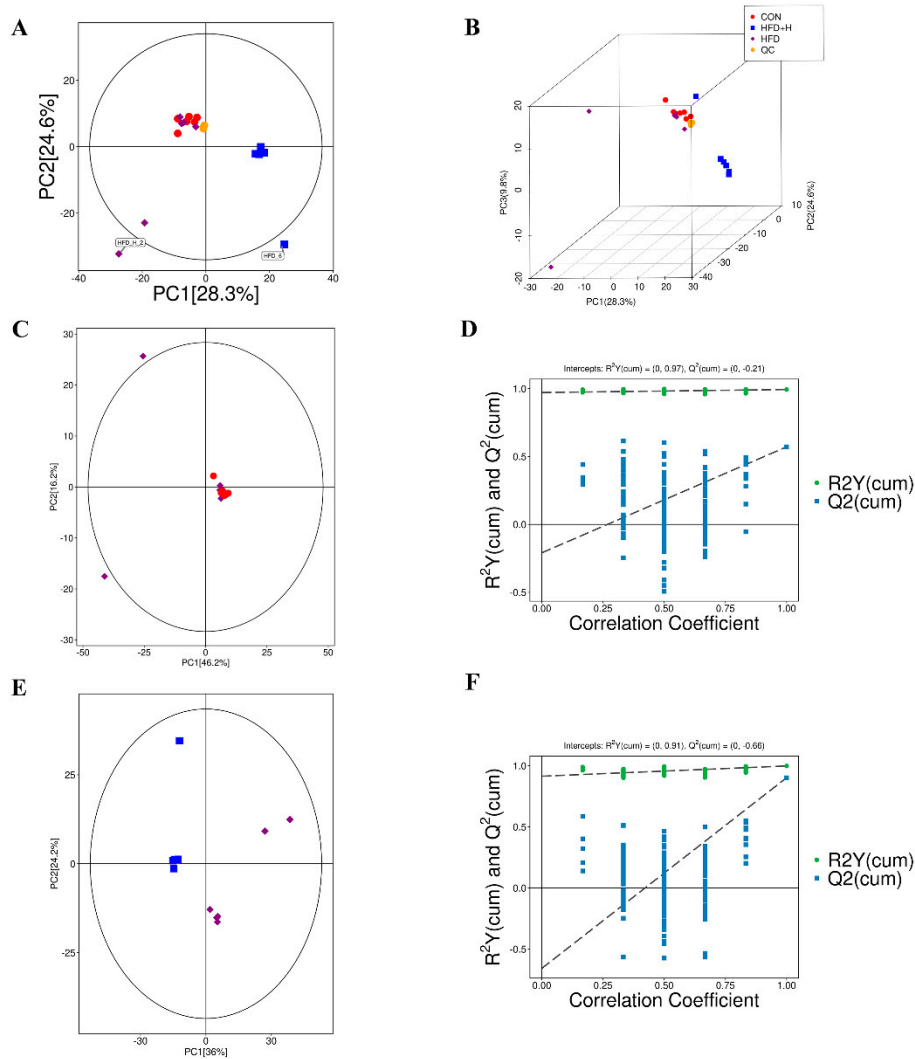

**Supplementary Figure S1:** Effect of PPE on serum metabolic profile. (A) PCA score plot and (B) PCA 3D score plot of serum metabolic profile of CK group, HFD group and HFD+H group. (C-D) PCA score plot and OPLS-DA score plot of serum metabolic profiles between CK group and HFD group. (E-F) PCA score plot and OPLS-DA score plot of serum metabolic profiles between HFD group and HFD+H group.
